# Supplementary material for: Two-dimensional impurity imaging in deep Antarctic ice cores:Snapshots of three climatic periods and implications forhigh-resolution signal interpretation
Source: Copernicus journal article supplement (doi:10.5194/tc-2020-369), 2020-12-23
Supplement: Supplementary file [file tc-2020-369-AC1-supplement.pdf]

1 **Manuscript TC-2020-369**

2 "Two-dimensional impurity imaging in deep Antarctic ice cores: Snapshots of three  
3 climatic periods and implications for high-resolution signal interpretation"

4 by Pascal Bohleber, Marco Roman, Martin Šala, Barbara Delmonte, Barbara Stenni and  
5 Carlo Barbante

6 - Response to reviews -

---

7 ***Please note:***

- 8 • ***All line numbers in "Changes to manuscript" refer to the new revised version***  
9 ***(if not noted otherwise)***
  - 10 • ***Changes in the revised pdf are highlighted in red***
  - 11 • ***Author's responses to the referee's comments are in blue***
- 

12  
13  
14 **Overview on manuscript revision**

15 We thank both referees for their positive and helpful reviews of our manuscript. The  
16 revision comprised the following main changes:

- 17 • The presentation of the imaging method was clarified regarding the connection  
18 between fast washout and high repetition rate (Section 2).
- 19 • The assessment of the spatial significance of line profiles (Section 3.4) was  
20 clarified in more simple terms to improve readability.
- 21 • The discussion on impurity localization was re-organized to better separate the  
22 discussion of the chemical images and aspects regarding the imaging method  
23 (Section 4.1).
- 24 • Figure 7,8,9 were changed to include the correlation matrix as a square plot. The  
25 Figures in the Supplementary Material were changed accordingly.

26 We believe that these changes have substantially improved the manuscript. The  
27 responses to the specific comments and technical corrections are detailed below (in  
28 blue) together with the track changes in the original manuscript (in red) which is at the  
29 end of this document.

30 **Response to referee #1 David M. Chew**

31 Dear editor,

32 This is an interesting study employing LA-ICP-MS mapping of ice cores from Antarctica.  
33 The glaciology/climatology aspects are not my area of expertise, so my substantive  
34 comments below mainly concern the methodology. The paper is generally easy to  
35 follow, but there are many instances of awkward phrasing. I have a list of suggested  
36 typographical improvements below, but the paper should have a quick edit by a native  
37 English speaker. I recommend minor revisions.

38 We thank the referee for the comments, which especially helped to present the  
39 methodology more clearly. We have addressed all comments as described below and  
40 have also tried to improve the readability of the text with the help of a native English  
41 speaker.

42

43 A washout of 34 ms is quoted (i.e. the system is capable of returning to baseline with a  
44 repletion rate of 29Hz). Yet it says in the paper L70-71 “With washout times in the tens  
45 of ms range, the recording of baseline-separated single pulses at high repetition rates  
46 becomes possible; 294 Hz and a dosage of 10 were used here”. There is no way with a  
47 washout of 34 ms that that you would see baseline-separated single pulses, so some  
48 rewording is needed here. Additionally, the term “dosage” is not used all that commonly  
49 in the LA-ICP-MS literature. I would define it in one sentence, and the recent JAAS article  
50 by Šala et al. could be cited.

51 We now realize that the two sentences can be misunderstood. With a dosage of 10 we  
52 improve the image quality but do not separate individual pulses anymore. To avoid this  
53 misunderstanding, we decided to separate the general statement regarding the benefit  
54 of fast washout and the specific statement regarding our acquisition settings. The  
55 general statement is now moved to the introduction, where the use of fast washout  
56 technology was already mentioned (line 31). This way, we are focusing in the method  
57 section solely on the description of our acquisition settings. We are also including the  
58 suggested reference by Šala et al. and give an explicit explanation of the term “dosage”  
59 (line 74).

60 30 employing dedicated ablation cells with fast washout as well as optimizing the lasing and ICP-MS settings have introduced a  
new state-of-the-art in imaging techniques with LA-ICP-MS (Wang et al., 2013; van Elteren et al., 2019). The term “washout  
time” refers to the time needed to transfer the ablated sample aerosol plume to the ICP-MS. It is principally determined by the  
extraction efficiency from the ablation cell and any subsequent dispersion in the transfer line. With washout times in the tens  
of ms range, the recording of baseline-separated single pulses at high repetition rates becomes possible (Van Malderen et al.,  
35 2015). Recently, this new imaging approach was transferred to ice core analysis with LA-ICP-MS, offering the opportunity

ARIS, a rapid aerosol transfer line, was used, resulting in a washout times of ~34 ms. A repetition rate of 294 Hz and a dosage of 10 was used here. In contrast to single pulse analysis, a dosage greater than 1 implies that each pixel is generated by multiple partially overlapping laser shots, which leads to an improved signal-to-noise ratio and better image quality (Šala et al., 2021). The fast washout combined with a high repetition rate allows scanning of the surface at around one millimeter per second, which is roughly 10 times faster than previous studies on ice cores (Della Lunga et al., 2017; Spaulding et al., 2017). As a

61

62 The isotopes  $^{23}\text{Na}$ ,  $^{25}\text{Mg}$  and  $^{88}\text{Sr}$  were measured, with dwell times of 4, 4.6 and 10 ms  
63 respectively. What was the total sweep time (i.e. including settling) and the duty cycle?

64 The total sweep time was set to 34 ms, matching the washout time in order to avoid  
65 image artefacts. We routinely acquired four analytes, including Na, Mg, Sr and the  
66 additional mass  $^{55}\text{Mn}$ , the latter with a dwell time of 10 ms. This results into a total duty  
67 cycle of ~84%. We added this information to the text. (line 86).

85 precise synchronization of data acquisition required to avoid image artifacts, the number of analytes/isotopes was restricted. Four elements were routinely recorded per image:  $^{23}\text{Na}$ ,  $^{25}\text{Mg}$ ,  $^{55}\text{Mn}$  and  $^{88}\text{Sr}$  with respective ICP-MS dwell times of 4, 4.6, 10 and 10 ms. (Bohleber et al., 2020). The total sweep time was 34 ms, specifically set to match the washout time, resulting in a total duty cycle of 84%. Considered in the following are Na, Mg and Sr, due to their significance as paleoclimate proxies in polar ice cores (Legrand and Mayewski, 1997): Na being related mostly to sea-salt, Mg with both marine and terrestrial sources

68

69 L138-140 “The relative higher background level seen in Na has been observed before in  
70 LA-ICP-MS ice core analysis and was suggested to be related to the use of NIST glasses  
71 as reference materials (Della Lunga et al., 2017).” Same would probably apply to any  
72 soda-lime glass. But my main query here were the signal intensity maps not  
73 background-corrected? And if not, why?

74 Following the referees’ comments, we find that we have to clarify here the fact that the  
75 higher levels observed for Na are mainly due a higher (absolute) instrumental  
76 sensitivity for the element, but we cannot exclude some memory effect due to the  
77 contextual ablation of glasses for tuning, drift correction and quantification, as  
78 hypothesized by Della Lunga et al. 2017. We decided to reword this paragraph to avoid  
79 this potential misunderstanding (line 147). To answer the question: Yes, the signal  
80 intensity maps were in fact background and drift corrected, this is already explicitly  
81 stated in Lines 84-85 of the original manuscript.

For further comparison of the degree of co-localization, the matrices of intensity values that underlie the images shown in Figure 2, 3 and 4 were used to make scatter plots for each pair of elements. As becomes evident from Figure 5, the intensities for Mg and Sr are generally similar, while Na intensities can be higher by several orders of magnitude. This difference can be explained by higher Na concentrations paired with a higher (absolute) instrumental sensitivity for the element. The scatter plots also indicate the almost absent co-localization in the TD Holocene image, showing signs of mutual exclusions (values

82

83

84 Typographical improvements

85 All suggested changes were made accordingly.

86

87 L54 “In presence of a variable signal” – reword start of sentence.

88 Changed accordingly. The respective sentence was reworded.

various depth sections were selected, that were representative of distinct climatic periods. The samples were analyzed, aiming to include a broad spectrum of ice properties, such as age and mean grain size. These snapshots of the 2D impurity distribution taken by LA-ICP-MS elemental imaging, provide important details on the location of impurities in relation to the grain boundary network. **The imprint of the grain boundaries may vary between different impurity species and climatic periods. Consequently, the spatial significance of a single line profile along the main core axis has to be carefully assessed. These 2D images provide new and improved information for this purpose.** It has also been shown how measurement settings can be adapted so LA-ICP-MS line profiles can be used when investigating climate proxy signals in highly thinned deep polar ice.

89

90 L56 delete “on this ground”

91 **Changed accordingly.**

92

93 L63 “keeps the ice samples surface temperature durably at” – change to “keeps the  
94 surface temperature of the ice samples consistently at”

95 **Changed accordingly.**

96

97 L91 “Sample selection was guided to consider ice of” change to “Sample selection  
98 targeted ice at”

99 **Changed accordingly.**

100

101 L93 change to “calls for mapping large areas”

102 **Changed accordingly.**

103

104 L99 change to “local maximum in grain radius at around 3.5 mm”

105 **Changed accordingly.**

106

107 L106 use of “sections” is confusing in this sentence. Are we talking about different  
108 samples, or area / domains within a sample.

109 **We are actually referring to certain parts of the image. We clarified this sentence  
110 accordingly.**

110 The elemental intensity distribution maps obtained are shown in Figures 2, 3 and 4, together with the optical images of the corresponding sample surface. All three analytes generally show sufficiently high signal/noise ratios. The three sets of maps show clear differences but are composed of similarly basic features. If sorted by increasing spatial extent, the basic features are: i) individual bright spots, typically comprising of just a few clustered bright pixels, ii) a network of lines, especially dominant for the Na maps, iii) mm-scale differences in the intensity, **with some parts of the images being distinctly lower in**

111

115 **intensity compared to the others.** Comparison with the optical images clearly shows that the network of high-intensity lines

112 L109 delete ‘their’

113 **Changed accordingly.**

114

115 L121 “In-grain intensities of Mg and Sr” is not clear.

116 **Reworded to clarify.**

– EPICA Dome C, MIS 5.5 (Figure 4): This sample stands out by showing a high degree of localization at grain boundaries for all elements. In the grain interiors, Mg and Sr occasionally show elevated intensities at locations close to the grain boundaries. Bright spots are almost completely absent.

117

118 L129 change to “in the Mg and Sr signal distribution”

119 Changed accordingly.

120

121 L133 delete “the image of”

122 Changed accordingly.

123

124 L146 change to “since they are superior in such cases”

125 Changed accordingly.

126

127 L159-160 change to “allows image segmentation based solely on the LA-ICP-MS images  
128 to be performed”

129 Changed accordingly.

130

131 L174 change to “between 3-6 times higher than for”

132 Changed accordingly.

133

134 L176 and 177. I do not follow either of these two sentences” “Both effects translate into  
135 an analogue situation for the ratios, with the exception of the Mg/Sr ratio. In grain  
136 boundaries, the latter shows only comparatively a small difference between MIS 2 and  
137 MIS 5.5.”

138 We have reworded both sentences in order to clarify.

The ratios reveal that the relative enrichment at grain boundaries is generally highest for Na, between 3-6 times higher than for Mg and around 10 times higher than for Sr. Next, the relative enrichment at grain boundaries is 3-5 times higher in MIS 5.5 compared to MIS 2. The relative higher enrichment of Na at grain boundaries translates into corresponding high values of Na/Mg and Na/Sr. The Mg/Sr ratio is also increased at grain boundaries, although to a lesser extent than the ratios including Na.

139

140 L186-7 delete “It is important to note that this analysis assumes the continued presence  
141 of optimized instrumental settings, thus no further artifacts are introduced.”

142 Changed accordingly.

143

144 L188 what is the “transversal dimension”? Do not follow.

145 We have rephrased the respective section in order to clarify what was done.

In order to simulate how the spatial impurity distribution would appear in coarser resolution LA-ICP-MS elemental imaging, the 35  $\mu\text{m}$  resolution images are sub-sampled in longitudinal (along the scan, i.e. left to right) and transversal (**perpendicular to the scan**) direction. The **transversal sub-sampling** is primarily simulating using a larger spot size whereas the decrease in longitudinal direction additionally corresponds to longer washout times. The rows of the original images are averaged stepwise

146

147 L192 change to “since it features”

148 **Changed accordingly.**

149

150 L197 change to “while comparatively smaller grains”

151 **Changed accordingly.**

152

153 L200 change to “only a small influence”. I do not follow “the relative transversal position” part of the sentence.

154 **Rephrased to clarify.**

210 scale of 700  $\mu\text{m}$ , the TD Holocene and EDC MIS 2 images resemble mostly the large-scale intensity gradients. At this point, a high degree of spatial significance of a single line is achieved. **This means that the obtained signal is largely independent of the positioning of the line profile perpendicular to the scan direction.** Notably, this situation is different for the EDC MIS 5.5 images, comprised by comparatively large grains. Regarding Mg, a comparable degree of homogeneity as for Na is achieved at the steps shown here, indicated by similar relative standard deviation (RSD) values (Supplementary Material).

156

157 L202 delete “at the steps shown here”

158 **Changed accordingly.**

159

160 L210 change to “but extend approach to samples from core sections”

161 **Changed accordingly.**

162

163 L217 replace “analyzing” with “of”

164 **Changed accordingly.**

165

166 L218-9 reword to “However, prior to the advent of the LA-ICP-MS imaging technique, elemental maps had to be acquired using arrays (grids) of laser spots with spot sizes larger than 100  $\mu\text{m}$ , followed by spatial interpolation”

169 **Changed accordingly.**

170

171 L231 change “may have fractions” to “may be”

172 **Changed accordingly.**

173

174 L237 I do not follow ‘may show “pinning of” or “dragging with”

175 **Rephrased to clarify.**

Considering the Na enrichment at the grain boundaries in a simplified view would mean that, with grains growing over time, the comparatively mobile (e.g. soluble Na) species are more easily collected at the grain boundaries as opposed to the less mobile species such as the insoluble particulate fraction. This is simplified because particulate inclusions may also inhibit grain boundary growth (e.g. through “pinning of” or “dragging with” grain boundaries). This process could also result in localization of particulate impurities at boundaries (Faria et al., 2014b; Stoll et al., 2021). It is evident that only limited generalized conclusions can be drawn from the small-sized images. Accordingly, it is not intended here to discuss in detail the different behavior of chemical impurities in relation to their mobility and insoluble fractions.

176

177 L244 delete “exemplarily” (this word is used incorrectly in all instances in the paper

178 Changed accordingly (and revised throughout the paper).

179

180 L254 delete “here analyzed”

181 Changed accordingly.

182

183 L257 delete “already investigate”

184 Changed accordingly.

185

186 L262-3 “image analysis applied to investigating the chemical images is advantageous”

187 Changed accordingly.

188

189 L269 delete “signal of”

190 Changed accordingly.

191

192 L272 replace “task” with “goal”

193 Changed accordingly.

194

195 L296 change to “not a generally applicable value, however as the larger grains”

196 Changed accordingly.

197

198 L305 change “recording” to “imaging”

199 Changed accordingly.

200

201 L311 change “regarding” to “for”

202 Changed accordingly.

203

204 L321-2 “are more distributed” is not clear

205 Rephrased to clarify.

differences among glacial and interglacial samples of the Talos Dome and EPICA Dome C ice cores from central Antarctica.

206 330 The images reveal that grain boundaries coincide with high intensities of Na for all samples. In the Talos Dome Holocene sample and the glacial sample from EPICA Dome C, Mg and Sr are presented also in the grain interiors. The interglacial

207 L324-6 change to “Simulations of coarser resolution experiments shows that the spatial  
208 significance of a single line profile increases as the imprint of grain-boundaries weakens  
209 at coarser resolution.”  
210 [Changed accordingly.](#)  
211  
212 L326 change to “This allows settings to be adapted specifically fit-for-purpose”  
213 [Changed accordingly.](#)  
214  
215 Figure 5 caption. Change second sentence to “A linear regression (red dashed line) is  
216 shown purely as a visual aid.”  
217 [Changed accordingly.](#)  
218  
219 Figure 7 caption. Change first sentence to “Example images illustrating the effect of  
220 decreasing the spatial resolution of the original image (a) in 35  $\mu\text{m}$  steps in the vertical  
221 and horizontal direction (see text).  
222 [Changed accordingly.](#)  
223  
224 Table 2 caption. Delete “Overview on results from”  
225 [Changed accordingly.](#)
